# Supplementary material for: MiR-371a-5p Positively Associates with Hepatocellular Carcinoma Malignancy but Sensitizes Cancer Cells to Oxaliplatin by Suppressing BECN1-Dependent Autophagy
Source: Life (Basel). 2022 Oct 20;12(10):1651. doi: 10.3390/life12101651 (PMC9604925; doi:10.3390/life12101651)
Supplement: Supplementary file 1 [file life-12-01651-s001.zip › Supplementary Table S1.xlsx]

## Sheet: TargetScanHuman_8.0
Table S1. miR-371a-5p target genes predicted by targetscan 8.0
Target gene	Representative transcript	Gene name
BTG3	ENST00000339775.6	BTG family, member 3
BECN1	ENST00000438274.3	beclin 1, autophagy related
CCDC23	ENST00000372522.1	coiled-coil domain containing 23
NETO1	ENST00000327305.6	neuropilin (NRP) and tolloid (TLL)-like 1
TSPAN31	ENST00000547992.1	tetraspanin 31
SRSF3	ENST00000373715.6	serine/arginine-rich splicing factor 3
SLC25A33	ENST00000302692.6	solute carrier family 25 (pyrimidine nucleotide carrier), member 33
SOX2	ENST00000325404.1	SRY (sex determining region Y)-box 2
AC007390.5	ENST00000402297.1	HCG1988162; Uncharacterized protein
ENOPH1	ENST00000273920.3	enolase-phosphatase 1
PSMC6	ENST00000445930.2	proteasome (prosome, macropain) 26S subunit, ATPase, 6
TMEM185B	ENST00000426077.2	transmembrane protein 185B
NEUROD1	ENST00000295108.3	neuronal differentiation 1
DCAF12	ENST00000361264.4	DDB1 and CUL4 associated factor 12
CCBL2	ENST00000370485.2	cysteine conjugate-beta lyase 2
SMIM21	ENST00000579022.1	small integral membrane protein 21
VPS35	ENST00000299138.7	vacuolar protein sorting 35 homolog (S. cerevisiae)
CCNY	ENST00000374706.1	cyclin Y
HSPA2	ENST00000394709.1	heat shock 70kDa protein 2
NDE1	ENST00000396353.2	nudE neurodevelopment protein 1
ZBTB37	ENST00000367701.5	zinc finger and BTB domain containing 37
C2orf43	ENST00000440866.2	chromosome 2 open reading frame 43
GLRX2	ENST00000367439.3	glutaredoxin 2
GTF2H3	ENST00000543341.2	general transcription factor IIH, polypeptide 3, 34kDa
ASCC1	ENST00000342444.4	activating signal cointegrator 1 complex subunit 1
RNF141	ENST00000265981.2	ring finger protein 141
ZNRF1	ENST00000335325.4	zinc and ring finger 1, E3 ubiquitin protein ligase
CITED2	ENST00000367651.2	Cbp/p300-interacting transactivator, with Glu/Asp-rich carboxy-terminal domain, 2
TEAD1	ENST00000361905.4	TEA domain family member 1 (SV40 transcriptional enhancer factor)
IKBKAP	ENST00000374647.5	inhibitor of kappa light polypeptide gene enhancer in B-cells, kinase complex-associated protein
MACROD2	ENST00000217246.4	MACRO domain containing 2
PCDH8	ENST00000377942.3	protocadherin 8
RCAN2	ENST00000330430.6	regulator of calcineurin 2
CNPY3	ENST00000394142.3	canopy FGF signaling regulator 3
CERK	ENST00000216264.8	ceramide kinase
KIAA0101	ENST00000558008.1	KIAA0101
WBP11	ENST00000261167.2	WW domain binding protein 11
CRYAA	ENST00000291554.2	crystallin, alpha A
EPM2AIP1	ENST00000322716.5	EPM2A (laforin) interacting protein 1
NARG2	ENST00000261520.4	NMDA receptor regulated 2
BTF3L4	ENST00000489308.2	basic transcription factor 3-like 4
BUB3	ENST00000368865.4	BUB3 mitotic checkpoint protein
OCLN	ENST00000355237.2	occludin
SEC23A	ENST00000537403.1	Sec23 homolog A (S. cerevisiae)
PKP4	ENST00000389757.3	plakophilin 4
MED29	ENST00000315588.5	mediator complex subunit 29
ZNF641	ENST00000301042.3	zinc finger protein 641
SCAMP1	ENST00000538629.1	secretory carrier membrane protein 1
UBFD1	ENST00000395878.3	ubiquitin family domain containing 1
RBM11	ENST00000400577.3	RNA binding motif protein 11
DAB1	ENST00000371236.2	Dab, reelin signal transducer, homolog 1 (Drosophila)
RER1	ENST00000378512.1	RER1 retention in endoplasmic reticulum 1 homolog (S. cerevisiae)
MED9	ENST00000268711.3	mediator complex subunit 9
POC1B-GALNT4	ENST00000547474.1	POC1B-GALNT4 readthrough
ELOVL7	ENST00000508821.1	ELOVL fatty acid elongase 7
LEF1	ENST00000265165.1	lymphoid enhancer-binding factor 1
ITGB8	ENST00000222573.4	integrin, beta 8
SOCS5	ENST00000306503.5	suppressor of cytokine signaling 5
SCRG1	ENST00000296506.3	stimulator of chondrogenesis 1
LRRC20	ENST00000355790.4	leucine rich repeat containing 20
PRRC2B	ENST00000372249.1	proline-rich coiled-coil 2B
NRF1	ENST00000393230.2	nuclear respiratory factor 1
CRIP2	ENST00000329146.4	cysteine-rich protein 2
CDC40	ENST00000368932.1	cell division cycle 40
CDC42SE1	ENST00000439374.2	CDC42 small effector 1
RPS6KA2	ENST00000265678.4	ribosomal protein S6 kinase, 90kDa, polypeptide 2
OTP	ENST00000306422.3	orthopedia homeobox
KIAA0907	ENST00000368320.3	KIAA0907
ZC3H6	ENST00000343936.4	zinc finger CCCH-type containing 6
NUDT5	ENST00000491614.1	nudix (nucleoside diphosphate linked moiety X)-type motif 5
PTPLAD1	ENST00000261875.5	protein tyrosine phosphatase-like A domain containing 1
HTRA1	ENST00000368984.3	HtrA serine peptidase 1
GMFB	ENST00000554908.1	glia maturation factor, beta
PAK3	ENST00000372007.5	p21 protein (Cdc42/Rac)-activated kinase 3
SPTBN1	ENST00000356805.4	spectrin, beta, non-erythrocytic 1
FAR2	ENST00000536681.3	fatty acyl CoA reductase 2
KIAA2022	ENST00000055682.6	KIAA2022
KCNJ6	ENST00000609713.1	potassium inwardly-rectifying channel, subfamily J, member 6
ANKS1B	ENST00000546960.1	ankyrin repeat and sterile alpha motif domain containing 1B
FTO	ENST00000471389.1	fat mass and obesity associated
SRRM1	ENST00000323848.9	serine/arginine repetitive matrix 1
SMEK1	ENST00000554684.1	SMEK homolog 1, suppressor of mek1 (Dictyostelium)
CELF2	ENST00000379261.4	CUGBP, Elav-like family member 2
CNOT2	ENST00000229195.3	CCR4-NOT transcription complex, subunit 2
TRMT2A	ENST00000404751.3	tRNA methyltransferase 2 homolog A (S. cerevisiae)
FLI1	ENST00000527786.2	Fli-1 proto-oncogene, ETS transcription factor
ASB4	ENST00000325885.5	ankyrin repeat and SOCS box containing 4
KDM6A	ENST00000377967.4	lysine (K)-specific demethylase 6A
APTX	ENST00000436040.2	aprataxin
SKP1	ENST00000353411.6	S-phase kinase-associated protein 1
REXO1	ENST00000170168.4	REX1, RNA exonuclease 1 homolog (S. cerevisiae)
MSL2	ENST00000309993.2	male-specific lethal 2 homolog (Drosophila)
EPS15	ENST00000371730.2	epidermal growth factor receptor pathway substrate 15
SIAH2	ENST00000312960.3	siah E3 ubiquitin protein ligase 2
PRPF38B	ENST00000370025.4	pre-mRNA processing factor 38B
SMC6	ENST00000448223.2	structural maintenance of chromosomes 6
ZC3H12D	ENST00000416573.2	zinc finger CCCH-type containing 12D
SFR1	ENST00000369729.3	SWI5-dependent recombination repair 1
PRPF4B	ENST00000337659.6	pre-mRNA processing factor 4B
UBE2G1	ENST00000396981.2	ubiquitin-conjugating enzyme E2G 1
CTNNA3	ENST00000433211.2	catenin (cadherin-associated protein), alpha 3
TRAPPC10	ENST00000291574.4	trafficking protein particle complex 10
LDB1	ENST00000361198.5	LIM domain binding 1
CELF1	ENST00000395290.2	CUGBP, Elav-like family member 1
SLC4A1AP	ENST00000326019.6	solute carrier family 4 (anion exchanger), member 1, adaptor protein
C2orf49	ENST00000258457.2	chromosome 2 open reading frame 49
HMGN2	ENST00000361427.5	high mobility group nucleosomal binding domain 2
PDE12	ENST00000311180.8	phosphodiesterase 12
SH3BGRL2	ENST00000369838.4	SH3 domain binding glutamic acid-rich protein like 2
EPN1	ENST00000270460.6	epsin 1
TKT	ENST00000462138.1	transketolase
FOXK1	ENST00000328914.4	forkhead box K1
HNRNPLL	ENST00000449105.3	heterogeneous nuclear ribonucleoprotein L-like
DCP2	ENST00000389063.2	decapping mRNA 2
RASAL2	ENST00000448150.3	RAS protein activator like 2
HRH4	ENST00000256906.4	histamine receptor H4
RTN3	ENST00000339997.4	reticulon 3
CSNK1A1	ENST00000261798.5	casein kinase 1, alpha 1
HDAC1	ENST00000373548.3	histone deacetylase 1
PPTC7	ENST00000354300.3	PTC7 protein phosphatase homolog (S. cerevisiae)
ZKSCAN1	ENST00000324306.6	zinc finger with KRAB and SCAN domains 1
SCRN1	ENST00000242059.5	secernin 1
TPT1	ENST00000379056.1	tumor protein, translationally-controlled 1
SET	ENST00000372692.4	SET nuclear oncogene
CAMK2G	ENST00000351293.3	calcium/calmodulin-dependent protein kinase II gamma
CCDC117	ENST00000249064.4	coiled-coil domain containing 117
COA3	ENST00000328434.7	cytochrome c oxidase assembly factor 3
ZKSCAN8	ENST00000330236.6	zinc finger with KRAB and SCAN domains 8
FAM46C	ENST00000369448.3	family with sequence similarity 46, member C
OTUD7B	ENST00000369135.4	OTU domain containing 7B
SAE1	ENST00000392776.3	SUMO1 activating enzyme subunit 1
MSRB3	ENST00000308259.5	methionine sulfoxide reductase B3
FRRS1L	ENST00000561981.2	ferric-chelate reductase 1-like
MYCN	ENST00000281043.3	v-myc avian myelocytomatosis viral oncogene neuroblastoma derived homolog
TMEM106B	ENST00000396667.3	transmembrane protein 106B
PTBP2	ENST00000609116.1	polypyrimidine tract binding protein 2
MAP3K1	ENST00000399503.3	mitogen-activated protein kinase kinase kinase 1, E3 ubiquitin protein ligase
SYNJ2BP	ENST00000256366.4	synaptojanin 2 binding protein
TBCEL	ENST00000422003.2	tubulin folding cofactor E-like
NEGR1	ENST00000357731.5	neuronal growth regulator 1
AATK	ENST00000326724.4	apoptosis-associated tyrosine kinase
ZBTB34	ENST00000319119.4	zinc finger and BTB domain containing 34
NAA50	ENST00000240922.3	N(alpha)-acetyltransferase 50, NatE catalytic subunit
SNIP1	ENST00000296215.6	Smad nuclear interacting protein 1
PCDH17	ENST00000377918.3	protocadherin 17
GPR75	ENST00000394705.2	G protein-coupled receptor 75
GOSR1	ENST00000225724.5	golgi SNAP receptor complex member 1
KPNA4	ENST00000334256.4	karyopherin alpha 4 (importin alpha 3)
PKMYT1	ENST00000440027.2	protein kinase, membrane associated tyrosine/threonine 1
SRPK2	ENST00000393651.3	SRSF protein kinase 2
PKNOX2	ENST00000298282.9	PBX/knotted 1 homeobox 2
YIPF4	ENST00000238831.4	Yip1 domain family, member 4
SURF4	ENST00000545297.1	surfeit 4
TMEM33	ENST00000504986.1	transmembrane protein 33
KRR1	ENST00000229214.4	KRR1, small subunit (SSU) processome component, homolog (yeast)
EEF2K	ENST00000263026.5	eukaryotic elongation factor-2 kinase
AGO1	ENST00000373204.4	argonaute RISC catalytic component 1
MIOS	ENST00000340080.4	missing oocyte, meiosis regulator, homolog (Drosophila)
COX15	ENST00000016171.5	cytochrome c oxidase assembly homolog 15 (yeast)
HELZ	ENST00000358691.5	helicase with zinc finger
CSRNP3	ENST00000314499.7	cysteine-serine-rich nuclear protein 3
POU6F2	ENST00000518318.2	POU class 6 homeobox 2
LPP	ENST00000312675.4	LIM domain containing preferred translocation partner in lipoma
NPFFR1	ENST00000277942.6	neuropeptide FF receptor 1
RLIM	ENST00000332687.6	ring finger protein, LIM domain interacting
FBXL20	ENST00000394294.3	F-box and leucine-rich repeat protein 20
CDC25A	ENST00000302506.3	cell division cycle 25A
BCLAF1	ENST00000531224.1	BCL2-associated transcription factor 1
SORCS1	ENST00000369698.1	sortilin-related VPS10 domain containing receptor 1
SOX4	ENST00000244745.1	SRY (sex determining region Y)-box 4
PTEN	ENST00000371953.3	phosphatase and tensin homolog
RBM7	ENST00000541475.1	RNA binding motif protein 7
CPEB4	ENST00000265085.5	cytoplasmic polyadenylation element binding protein 4
YAF2	ENST00000327791.4	YY1 associated factor 2
ZBTB41	ENST00000367405.4	zinc finger and BTB domain containing 41
KDM5A	ENST00000399788.2	lysine (K)-specific demethylase 5A
RNF115	ENST00000369291.5	ring finger protein 115
UTP6	ENST00000261708.4	UTP6, small subunit (SSU) processome component, homolog (yeast)
COL8A1	ENST00000261037.3	collagen, type VIII, alpha 1
ACVR1B	ENST00000257963.4	activin A receptor, type IB
TIFAB	ENST00000537858.1	TRAF-interacting protein with forkhead-associated domain, family member B
MFSD4	ENST00000367147.4	major facilitator superfamily domain containing 4
CADM2	ENST00000383699.3	cell adhesion molecule 2
CCDC144A	ENST00000443444.2	coiled-coil domain containing 144A
GPRIN3	ENST00000609438.1	GPRIN family member 3
FAM26E	ENST00000368599.3	family with sequence similarity 26, member E
XIAP	ENST00000371199.3	X-linked inhibitor of apoptosis
UBE2V2	ENST00000523111.2	ubiquitin-conjugating enzyme E2 variant 2
C4orf29	ENST00000388795.5	chromosome 4 open reading frame 29
CLSPN	ENST00000318121.3	claspin
ANKRD45	ENST00000333279.2	ankyrin repeat domain 45
HACE1	ENST00000262903.4	HECT domain and ankyrin repeat containing E3 ubiquitin protein ligase 1
R3HDM2	ENST00000347140.3	R3H domain containing 2
RABEP1	ENST00000262477.6	rabaptin, RAB GTPase binding effector protein 1
CNOT6	ENST00000393356.1	CCR4-NOT transcription complex, subunit 6
MRPS30	ENST00000507110.1	mitochondrial ribosomal protein S30
PURB	ENST00000395699.2	purine-rich element binding protein B
LAMTOR3	ENST00000499666.2	late endosomal/lysosomal adaptor, MAPK and MTOR activator 3
MAPK1IP1L	ENST00000395468.4	mitogen-activated protein kinase 1 interacting protein 1-like
BAHD1	ENST00000416165.1	bromo adjacent homology domain containing 1
PAIP2B	ENST00000244221.8	poly(A) binding protein interacting protein 2B
PANK3	ENST00000239231.6	pantothenate kinase 3
NDFIP1	ENST00000253814.4	Nedd4 family interacting protein 1
DLEU1	ENST00000378180.4	deleted in lymphocytic leukemia 1 (non-protein coding)
EEF1A1	ENST00000316292.9	eukaryotic translation elongation factor 1 alpha 1
ZNF366	ENST00000318442.5	zinc finger protein 366
TSPYL4	ENST00000420283.1	TSPY-like 4
ABHD2	ENST00000352732.5	abhydrolase domain containing 2
CASZ1	ENST00000377022.3	castor zinc finger 1
KIF3B	ENST00000375712.3	kinesin family member 3B
MN1	ENST00000302326.4	meningioma (disrupted in balanced translocation) 1
STK40	ENST00000359297.2	serine/threonine kinase 40
AMIGO1	ENST00000369864.4	adhesion molecule with Ig-like domain 1
FAM178A	ENST00000238961.4	family with sequence similarity 178, member A
SRSF12	ENST00000452027.2	serine/arginine-rich splicing factor 12
GSE1	ENST00000253458.7	Gse1 coiled-coil protein
ETV5	ENST00000306376.5	ets variant 5
ARAP2	ENST00000303965.4	ArfGAP with RhoGAP domain, ankyrin repeat and PH domain 2
THOC3	ENST00000265097.4	THO complex 3
ZNF516	ENST00000443185.2	zinc finger protein 516
GCA	ENST00000437150.2	grancalcin, EF-hand calcium binding protein
STXBP4	ENST00000376352.2	syntaxin binding protein 4
ZFP36L2	ENST00000282388.3	ZFP36 ring finger protein-like 2
RNF150	ENST00000515673.2	ring finger protein 150
FGFRL1	ENST00000264748.6	fibroblast growth factor receptor-like 1
BLOC1S5	ENST00000397457.2	biogenesis of lysosomal organelles complex-1, subunit 5, muted
KIAA0232	ENST00000425103.1	KIAA0232
ATG14	ENST00000247178.5	autophagy related 14
ZFHX3	ENST00000268489.5	zinc finger homeobox 3
ELK4	ENST00000357992.4	ELK4, ETS-domain protein (SRF accessory protein 1)
FAM107B	ENST00000378470.1	family with sequence similarity 107, member B
CYP4F11	ENST00000326742.8	cytochrome P450, family 4, subfamily F, polypeptide 11
SLC16A7	ENST00000261187.4	solute carrier family 16 (monocarboxylate transporter), member 7
SHROOM3	ENST00000296043.6	shroom family member 3
CDC73	ENST00000367435.3	cell division cycle 73
IKZF3	ENST00000346872.3	IKAROS family zinc finger 3 (Aiolos)
PDE10A	ENST00000366882.1	phosphodiesterase 10A
CLSTN2	ENST00000458420.3	calsyntenin 2
CCNL1	ENST00000295926.3	cyclin L1
MMP16	ENST00000286614.6	matrix metallopeptidase 16 (membrane-inserted)
KAT7	ENST00000259021.4	K(lysine) acetyltransferase 7
WDR37	ENST00000358220.1	WD repeat domain 37
SCN2A	ENST00000375437.2	sodium channel, voltage-gated, type II, alpha subunit
DGKG	ENST00000265022.3	diacylglycerol kinase, gamma 90kDa
ATP1A2	ENST00000361216.3	ATPase, Na+/K+ transporting, alpha 2 polypeptide
LIN52	ENST00000555028.1	lin-52 homolog (C. elegans)
ARID5B	ENST00000279873.7	AT rich interactive domain 5B (MRF1-like)
COL9A1	ENST00000357250.6	collagen, type IX, alpha 1
STAT3	ENST00000585517.1	signal transducer and activator of transcription 3 (acute-phase response factor)
SH3BP5L	ENST00000366472.5	SH3-binding domain protein 5-like
SUFU	ENST00000369902.3	suppressor of fused homolog (Drosophila)
SCN1A	ENST00000423058.2	sodium channel, voltage-gated, type I, alpha subunit
KMT2D	ENST00000301067.7	lysine (K)-specific methyltransferase 2D
MORN4	ENST00000478953.1	MORN repeat containing 4
PKDCC	ENST00000294964.5	protein kinase domain containing, cytoplasmic
MTA2	ENST00000278823.2	metastasis associated 1 family, member 2
FURIN	ENST00000268171.3	furin (paired basic amino acid cleaving enzyme)
BVES	ENST00000314641.5	blood vessel epicardial substance
ROCK1	ENST00000399799.2	Rho-associated, coiled-coil containing protein kinase 1
PHLPP2	ENST00000568954.1	PH domain and leucine rich repeat protein phosphatase 2
SMAD7	ENST00000262158.2	SMAD family member 7
NAV1	ENST00000295624.6	neuron navigator 1
SLC41A1	ENST00000367137.3	solute carrier family 41 (magnesium transporter), member 1
PSTPIP2	ENST00000409746.5	proline-serine-threonine phosphatase interacting protein 2
DIAPH2	ENST00000324765.8	diaphanous-related formin 2
TRNP1	ENST00000522111.2	TMF1-regulated nuclear protein 1
PLXND1	ENST00000393239.1	plexin D1
C2orf69	ENST00000319974.5	chromosome 2 open reading frame 69
ZNF652	ENST00000362063.2	zinc finger protein 652
MYCBP2	ENST00000544440.2	MYC binding protein 2, E3 ubiquitin protein ligase
CALU	ENST00000535011.2	calumenin
COL1A1	ENST00000225964.5	collagen, type I, alpha 1
NUAK1	ENST00000261402.2	NUAK family, SNF1-like kinase, 1
BFAR	ENST00000261658.2	bifunctional apoptosis regulator
SLC16A10	ENST00000368850.3	solute carrier family 16 (aromatic amino acid transporter), member 10
ZNF644	ENST00000370440.1	zinc finger protein 644
BCORL1	ENST00000540052.1	BCL6 corepressor-like 1
SSX2IP	ENST00000342203.3	synovial sarcoma, X breakpoint 2 interacting protein
CHST11	ENST00000549260.1	carbohydrate (chondroitin 4) sulfotransferase 11
VPS37A	ENST00000324849.4	vacuolar protein sorting 37 homolog A (S. cerevisiae)
CDC42EP3	ENST00000295324.3	CDC42 effector protein (Rho GTPase binding) 3
PIP4K2B	ENST00000269554.3	phosphatidylinositol-5-phosphate 4-kinase, type II, beta
SLC23A2	ENST00000338244.1	solute carrier family 23 (ascorbic acid transporter), member 2
C15orf38	ENST00000357484.5	chromosome 15 open reading frame 38
SENP6	ENST00000541192.1	SUMO1/sentrin specific peptidase 6
SUGT1	ENST00000310528.8	SGT1, suppressor of G2 allele of SKP1 (S. cerevisiae)
CFL2	ENST00000341223.3	cofilin 2 (muscle)
GOLGA7	ENST00000405786.2	golgin A7
GPD2	ENST00000540309.1	glycerol-3-phosphate dehydrogenase 2 (mitochondrial)
CTDSPL2	ENST00000260327.4	CTD (carboxy-terminal domain, RNA polymerase II, polypeptide A) small phosphatase like 2
STRIP2	ENST00000249344.2	striatin interacting protein 2
RRAGD	ENST00000369415.4	Ras-related GTP binding D
ZBTB7A	ENST00000322357.4	zinc finger and BTB domain containing 7A
IMPAD1	ENST00000262644.4	inositol monophosphatase domain containing 1
ENDOD1	ENST00000278505.4	endonuclease domain containing 1
CALCRL	ENST00000392370.3	calcitonin receptor-like
GTPBP8	ENST00000383677.3	GTP-binding protein 8 (putative)
PBX1	ENST00000367897.1	pre-B-cell leukemia homeobox 1
RNF11	ENST00000242719.3	ring finger protein 11
PTRH2	ENST00000393038.2	peptidyl-tRNA hydrolase 2
NOVA2	ENST00000263257.5	neuro-oncological ventral antigen 2
QPCT	ENST00000338415.3	glutaminyl-peptide cyclotransferase
KIAA1468	ENST00000398130.2	KIAA1468
ATG13	ENST00000359513.4	autophagy related 13
ELOVL6	ENST00000394607.3	ELOVL fatty acid elongase 6
CUL3	ENST00000264414.4	cullin 3
FBXL3	ENST00000355619.5	F-box and leucine-rich repeat protein 3
RP11-122A3.2	ENST00000517562.2	uncharacterized protein LOC100127983
SPRYD7	ENST00000361840.3	SPRY domain containing 7
CREBZF	ENST00000398294.2	CREB/ATF bZIP transcription factor
YIPF6	ENST00000462683.1	Yip1 domain family, member 6
RAB33B	ENST00000305626.5	RAB33B, member RAS oncogene family
NABP1	ENST00000410026.2	nucleic acid binding protein 1
RAP2B	ENST00000323534.2	RAP2B, member of RAS oncogene family
ZBTB14	ENST00000357006.4	zinc finger and BTB domain containing 14
TSPYL1	ENST00000368608.3	TSPY-like 1
SSBP2	ENST00000320672.4	single-stranded DNA binding protein 2
MARCKS	ENST00000368635.4	myristoylated alanine-rich protein kinase C substrate
CHD7	ENST00000423902.2	chromodomain helicase DNA binding protein 7
HNRNPA3	ENST00000411529.2	heterogeneous nuclear ribonucleoprotein A3
CNOT7	ENST00000361272.4	CCR4-NOT transcription complex, subunit 7
ZBTB24	ENST00000230122.3	zinc finger and BTB domain containing 24
ZNF281	ENST00000294740.3	zinc finger protein 281
RIMKLB	ENST00000357529.3	ribosomal modification protein rimK-like family member B
HOXC8	ENST00000040584.4	homeobox C8
YPEL2	ENST00000312655.4	yippee-like 2 (Drosophila)
C3orf80	ENST00000326474.3	chromosome 3 open reading frame 80
NECAB1	ENST00000417640.2	N-terminal EF-hand calcium binding protein 1
ASB6	ENST00000277459.4	ankyrin repeat and SOCS box containing 6
KREMEN1	ENST00000400335.4	kringle containing transmembrane protein 1
XXYLT1	ENST00000310380.6	xyloside xylosyltransferase 1
C1orf52	ENST00000471115.1	chromosome 1 open reading frame 52
CACNG4	ENST00000262138.3	calcium channel, voltage-dependent, gamma subunit 4
DLG4	ENST00000399506.2	discs, large homolog 4 (Drosophila)
PDAP1	ENST00000350498.3	PDGFA associated protein 1
ERP29	ENST00000455836.1	endoplasmic reticulum protein 29
KDM3A	ENST00000409556.1	lysine (K)-specific demethylase 3A
TRERF1	ENST00000541110.1	transcriptional regulating factor 1
GPX3	ENST00000517973.1	glutathione peroxidase 3 (plasma)
FRK	ENST00000606080.1	fyn-related kinase
UBTD2	ENST00000393792.2	ubiquitin domain containing 2
VMP1	ENST00000262291.4	vacuole membrane protein 1
KRIT1	ENST00000394507.1	KRIT1, ankyrin repeat containing
SYT11	ENST00000368324.4	synaptotagmin XI
FAM64A	ENST00000570337.2	family with sequence similarity 64, member A
MALT1	ENST00000348428.3	mucosa associated lymphoid tissue lymphoma translocation gene 1
ATP2B2	ENST00000352432.4	ATPase, Ca++ transporting, plasma membrane 2
CAND1	ENST00000545606.1	cullin-associated and neddylation-dissociated 1
SUV420H1	ENST00000304363.4	suppressor of variegation 4-20 homolog 1 (Drosophila)
SLC7A1	ENST00000380752.5	solute carrier family 7 (cationic amino acid transporter, y+ system), member 1
TGFB2	ENST00000366930.4	transforming growth factor, beta 2
ACSL3	ENST00000357430.3	acyl-CoA synthetase long-chain family member 3
SYNCRIP	ENST00000355238.6	synaptotagmin binding, cytoplasmic RNA interacting protein
GLUD2	ENST00000328078.1	glutamate dehydrogenase 2
DNAL1	ENST00000553645.2	dynein, axonemal, light chain 1
PAPSS2	ENST00000361175.4	3'-phosphoadenosine 5'-phosphosulfate synthase 2
NAA40	ENST00000377793.4	N(alpha)-acetyltransferase 40, NatD catalytic subunit
SLC16A13	ENST00000308027.6	solute carrier family 16, member 13
SH3D19	ENST00000409598.4	SH3 domain containing 19
TMED4	ENST00000457408.2	transmembrane emp24 protein transport domain containing 4
MME	ENST00000460393.1	membrane metallo-endopeptidase
SDC2	ENST00000302190.4	syndecan 2
CYLD	ENST00000540145.1	cylindromatosis (turban tumor syndrome)
SHH	ENST00000297261.2	sonic hedgehog
C5orf42	ENST00000508244.1	chromosome 5 open reading frame 42
SRSF7	ENST00000313117.6	serine/arginine-rich splicing factor 7
GPR180	ENST00000376958.4	G protein-coupled receptor 180
AQR	ENST00000156471.5	aquarius intron-binding spliceosomal factor
FAM149B1	ENST00000242505.6	family with sequence similarity 149, member B1
SWAP70	ENST00000318950.6	SWAP switching B-cell complex 70kDa subunit
RSBN1L	ENST00000334955.8	round spermatid basic protein 1-like
GLG1	ENST00000422840.2	golgi glycoprotein 1
SRCAP	ENST00000262518.4	Snf2-related CREBBP activator protein
LPAR3	ENST00000440886.1	lysophosphatidic acid receptor 3
ETV1	ENST00000430479.1	ets variant 1
MTERF	ENST00000419292.1	mitochondrial transcription termination factor
TRIM13	ENST00000378182.3	tripartite motif containing 13
CDK12	ENST00000447079.4	cyclin-dependent kinase 12
DYRK3	ENST00000367108.3	dual-specificity tyrosine-(Y)-phosphorylation regulated kinase 3
SIKE1	ENST00000369528.5	suppressor of IKBKE 1
TENM4	ENST00000278550.7	teneurin transmembrane protein 4
SRSF9	ENST00000229390.3	serine/arginine-rich splicing factor 9
TRIP4	ENST00000261884.3	thyroid hormone receptor interactor 4
RPRD2	ENST00000539519.1	regulation of nuclear pre-mRNA domain containing 2
LARS2	ENST00000415258.1	leucyl-tRNA synthetase 2, mitochondrial
GTDC1	ENST00000392869.2	glycosyltransferase-like domain containing 1
PSMA4	ENST00000558094.1	proteasome (prosome, macropain) subunit, alpha type, 4
DDI2	ENST00000480945.1	DNA-damage inducible 1 homolog 2 (S. cerevisiae)
RAB11A	ENST00000569896.1	RAB11A, member RAS oncogene family
FARSB	ENST00000281828.6	phenylalanyl-tRNA synthetase, beta subunit
THRA	ENST00000450525.2	thyroid hormone receptor, alpha
TPR	ENST00000367478.4	translocated promoter region, nuclear basket protein
PAH	ENST00000553106.1	phenylalanine hydroxylase
PLEKHG1	ENST00000367328.1	pleckstrin homology domain containing, family G (with RhoGef domain) member 1
CDC6	ENST00000209728.4	cell division cycle 6
CCDC171	ENST00000380701.3	coiled-coil domain containing 171
UBE2J1	ENST00000435041.2	ubiquitin-conjugating enzyme E2, J1
DNAH9	ENST00000262442.4	dynein, axonemal, heavy chain 9
EVI2A	ENST00000461237.1	ecotropic viral integration site 2A
SLC36A1	ENST00000243389.3	solute carrier family 36 (proton/amino acid symporter), member 1
TSHR	ENST00000541158.2	thyroid stimulating hormone receptor
TIMD4	ENST00000274532.2	T-cell immunoglobulin and mucin domain containing 4
DLGAP3	ENST00000373347.1	discs, large (Drosophila) homolog-associated protein 3
RYK	ENST00000296084.4	receptor-like tyrosine kinase
UVRAG	ENST00000356136.3	UV radiation resistance associated
METAP1	ENST00000296411.6	methionyl aminopeptidase 1
COLEC10	ENST00000332843.2	collectin sub-family member 10 (C-type lectin)
DNAJB1	ENST00000254322.2	DnaJ (Hsp40) homolog, subfamily B, member 1
ABHD15	ENST00000307201.4	abhydrolase domain containing 15
